# Supplementary material
Source: HighWire-hosted journal article supplement (https://tobaccocontrol.bmj.com/content/32/4/513)
Supplement: inline-supplementary-material-1 [file inline-supplementary-material-1.pdf]

1 Online Supplemental Material

2 Table 1. Comparison of straw cigarettes and cigarettes from 2013, 2016, and 2019 combined

| <b>Marketing Appeal</b>          | <b>Straw cigarettes<br/>(n=32)</b> | <b>Cigarettes<br/>(n=353)</b> | <b>Straw cigarettes vs<br/>cigarettes <i>p</i></b> |
|----------------------------------|------------------------------------|-------------------------------|----------------------------------------------------|
| <b>Luxury/quality</b>            | 100%                               | 36.0%                         | <0.001*                                            |
| <b>“Artesanal”, “Artesanais”</b> | 93.8%                              | 0%                            | <0.001*                                            |
| <b>Masculinity</b>               | 56.3%                              | 4.3%                          | <0.001*                                            |
| <b>Classic/timeless</b>          | 46.9%                              | 51.0%                         | 0.655                                              |
| <b>“Traditional”</b>             | 18.8%                              | 0.3%                          | <0.001*                                            |
| <b>“Original”, “Signature”</b>   | 15.6%                              | 11.1%                         | 0.435                                              |
| <b>Flavors</b>                   | 50.0%                              | 15.6%                         | <0.001*                                            |
| <b>Less harm</b>                 | 31.3%                              | 6.8%                          | <0.001*                                            |

3 The result is significant at  $p < .05$ .
